# Supplementary material for: Integrated genome-wide Alu methylation and transcriptome profiling analyses reveal novel epigenetic regulatory networks associated with autism spectrum disorder
Source: PubMed Central journal article supplement (PMC5902935; doi:10.1186/s13229-018-0213-9), 2018-04-16

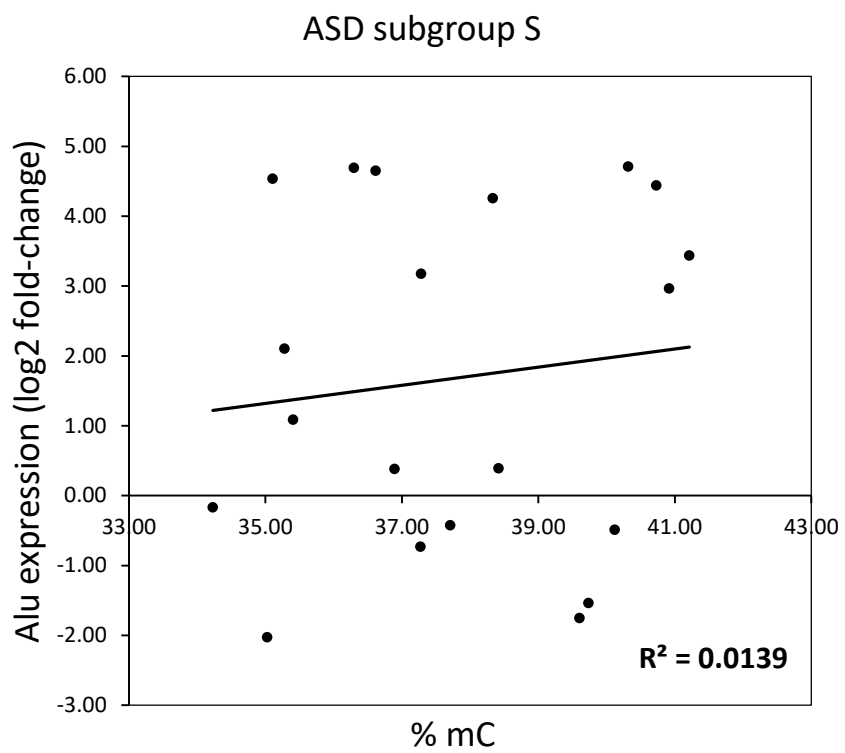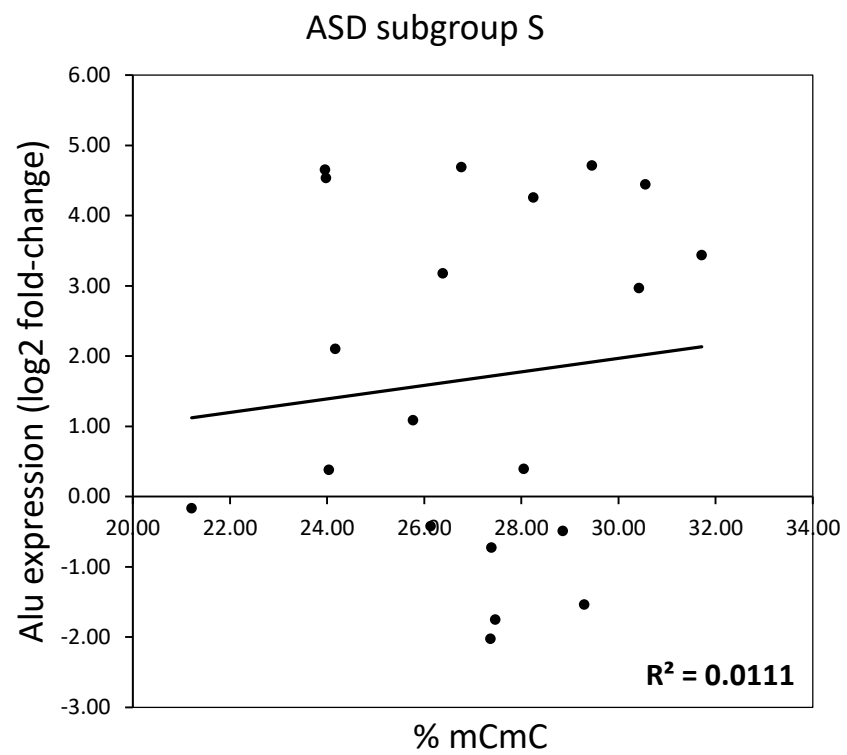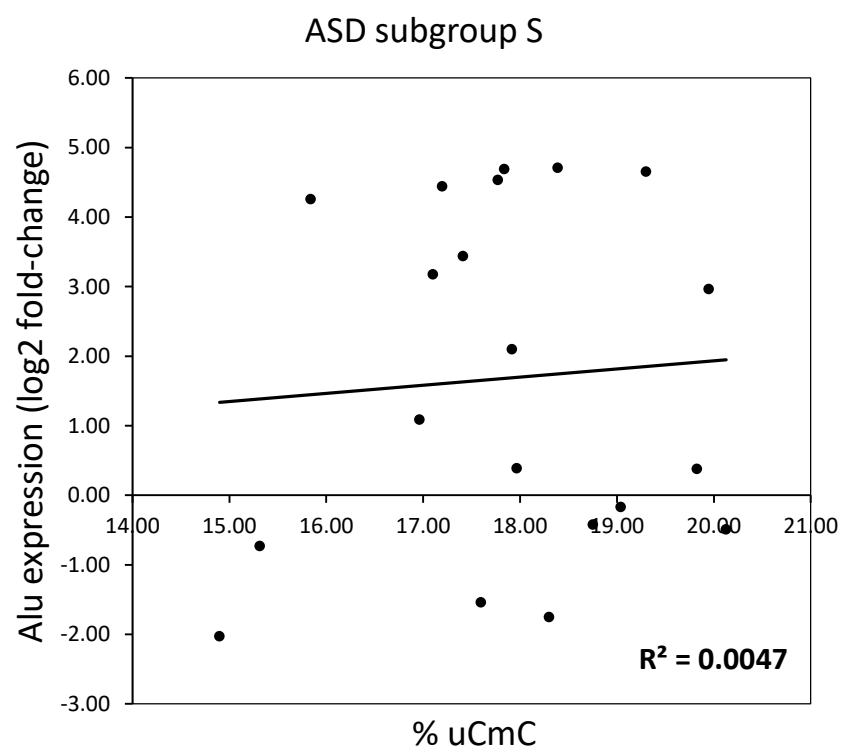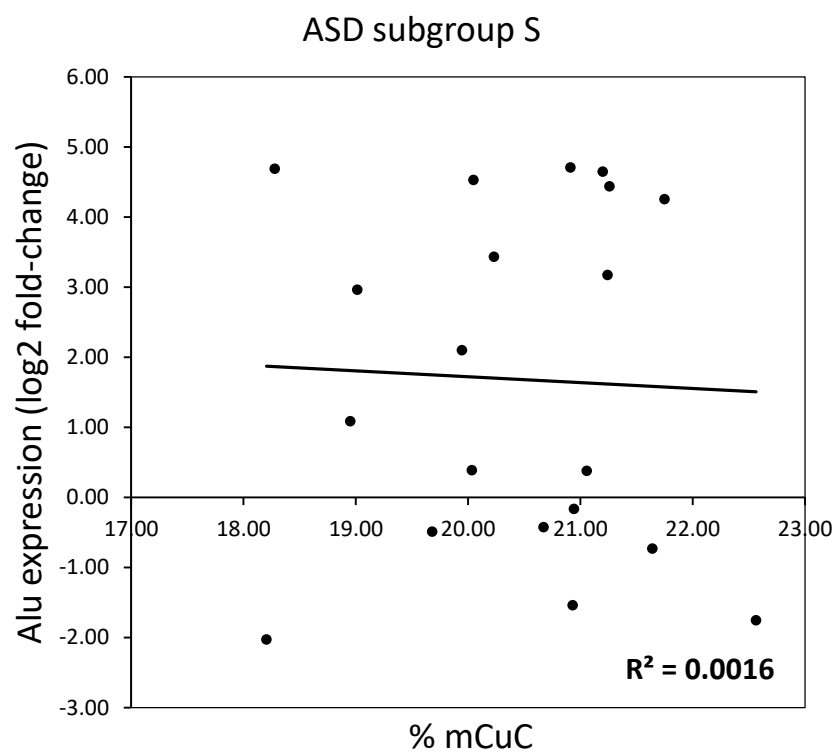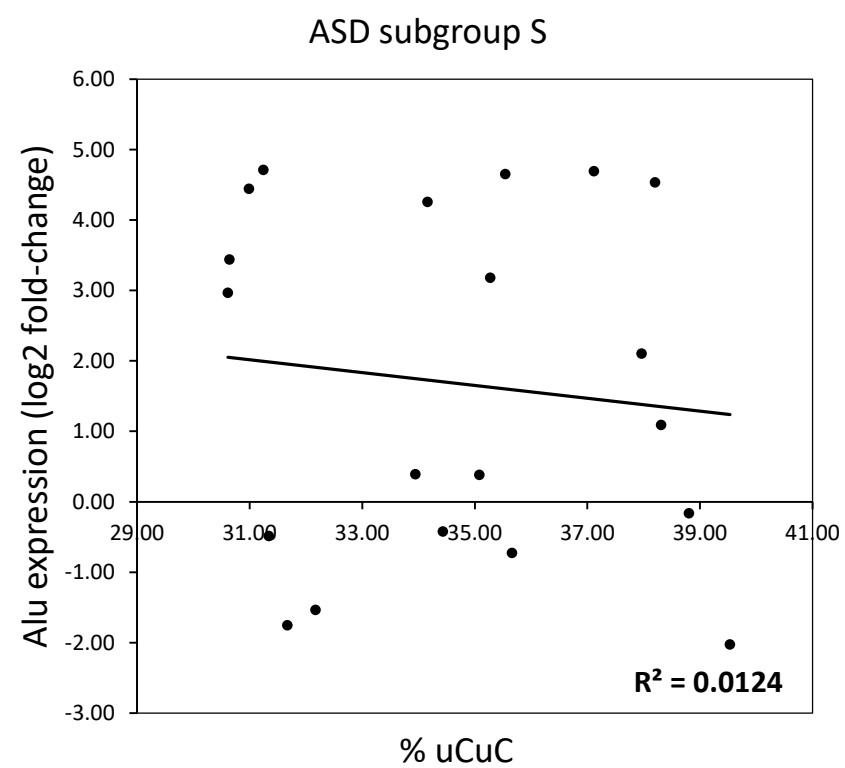

Supplement: 13229_2018_213_MOESM6_ESM.pdf [file 13229_2018_213_MOESM6_ESM.pdf]
